# Supplementary figures and images for: Development of a Biocontrol Method Applying Bacteriophage-Containing Aerosol against Mycobacterium tuberculosis Using the Bacteriophage BTCU-1 and M. smegmatis as Models
Source: MDPI journal article supplement (doi:10.3390/microorganisms7080237), 2019-08-03

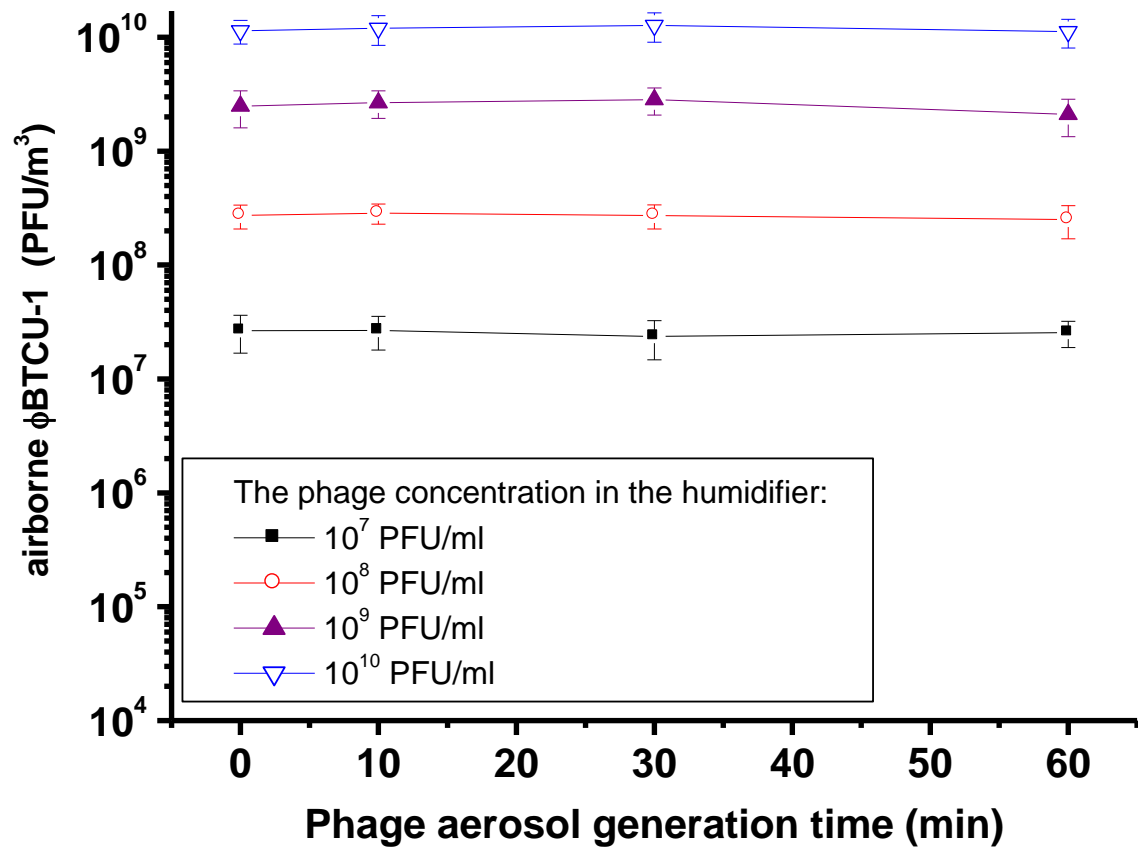

**Figure S3.** The stability of culturable phage  $\phi$ BTCU-1 in the air of test chamber.

Supplement: s1 [file s1]

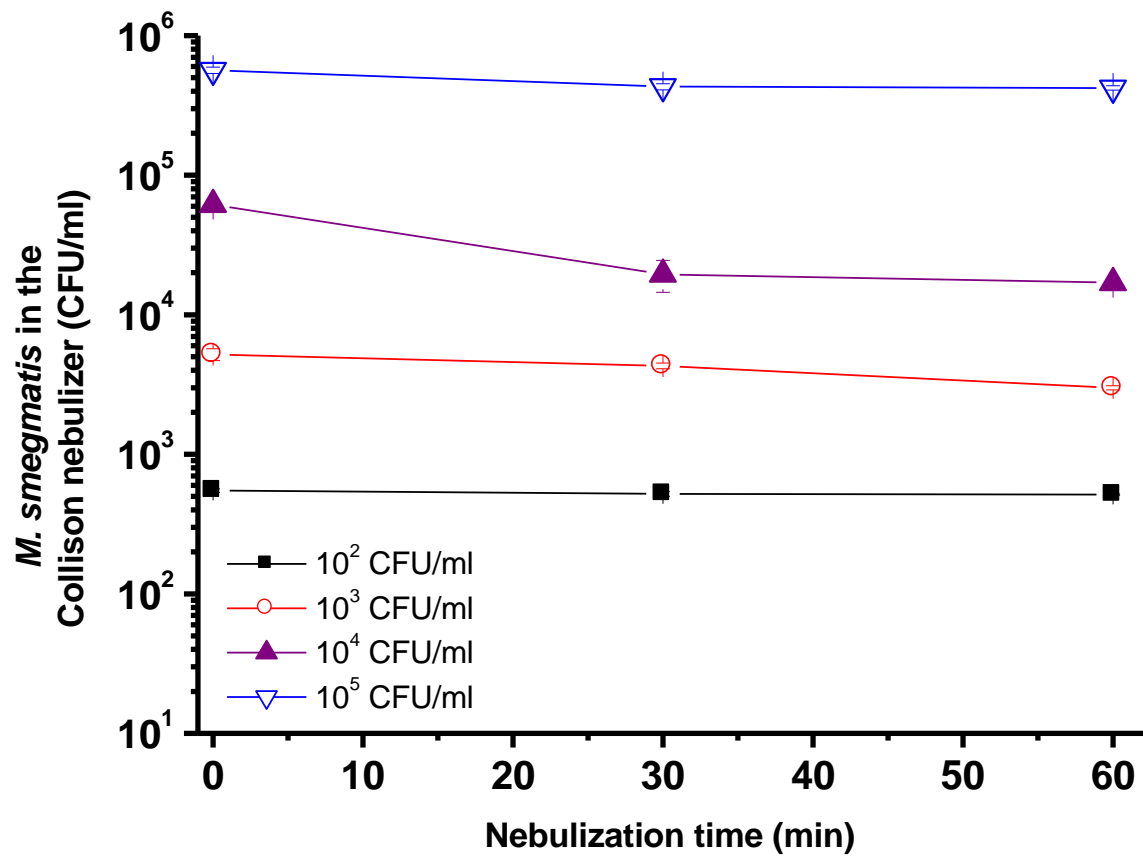

**Figure S1.** The stability of culturable *M. smegmatis* in the Collison three-jet nebulizer.

Supplement: s1 [file s1]

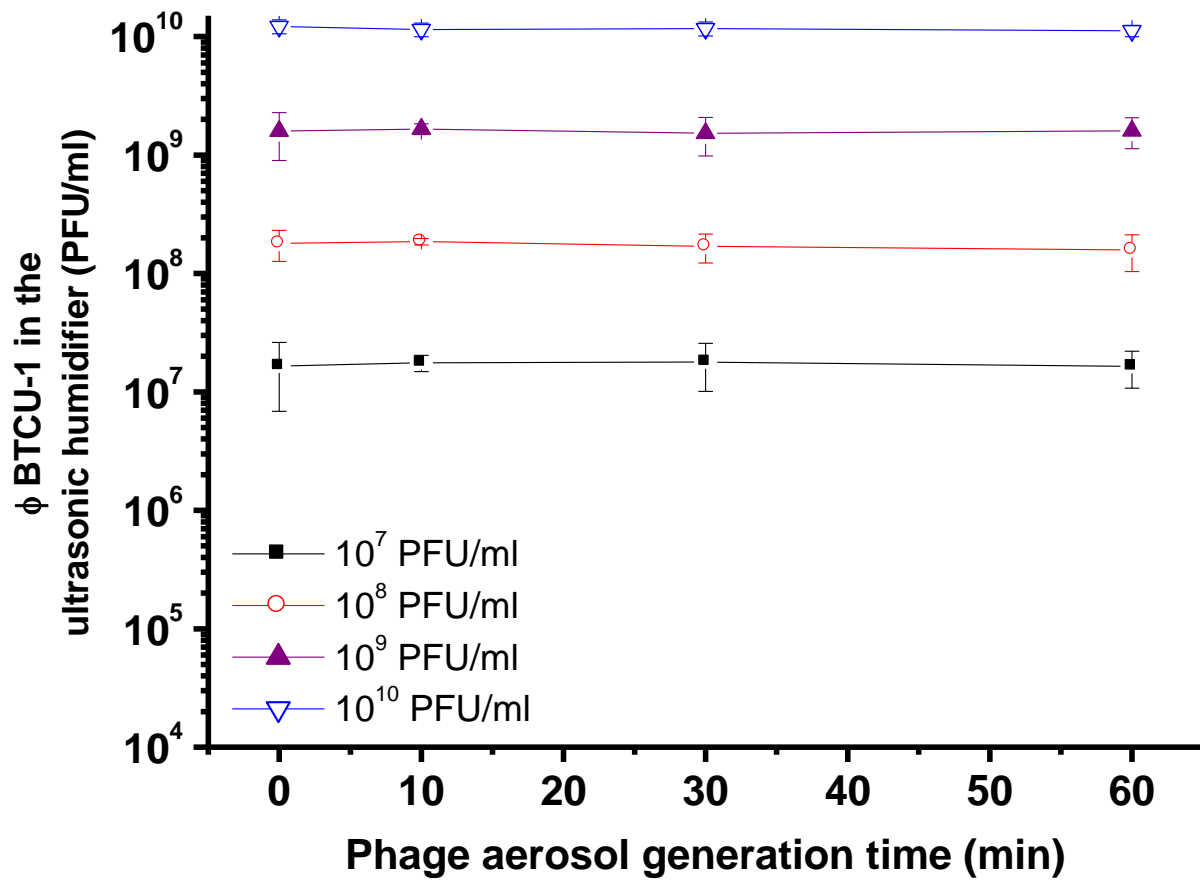

**Figure S2.** The stability of culturable phage  $\phi$ BTCU-1 in the ultrasonic humidifier.

Supplement: s1 [file s1]
